# Supplementary material
Source: ML conference proceedings conference paper supplement (https://proceedings.neurips.cc/paper_files/paper/2019/hash/328347805873e9a9c700591812fb0ec2-Abstract.html)
Supplement: Supplementary file [file 328347805873e9a9c700591812fb0ec2-Supplemental.zip]

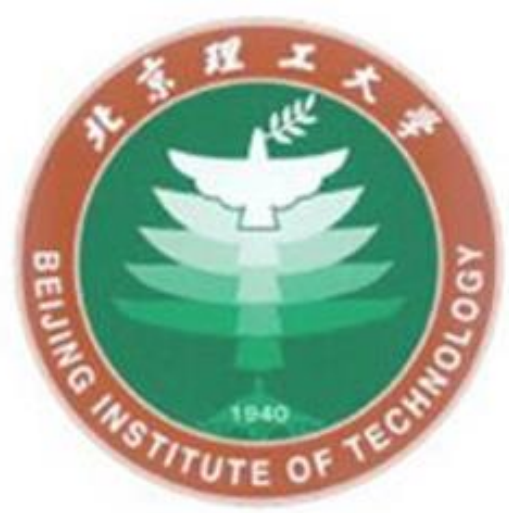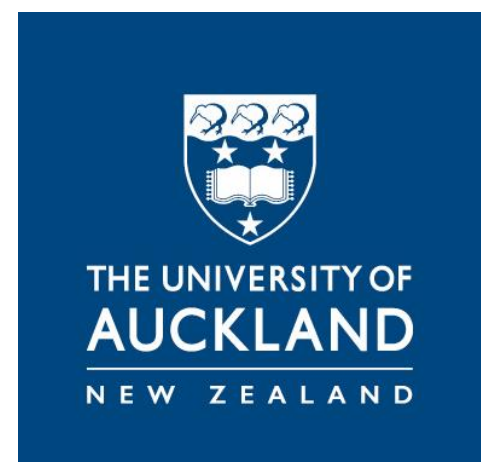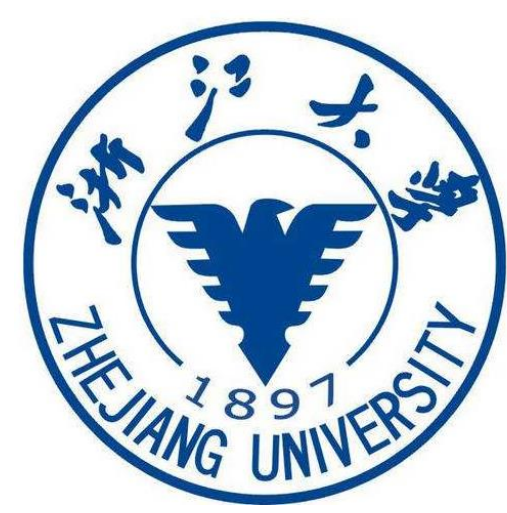

# REM: From Structural Entropy To Community Structure Deception

Yiwei Liu<sup>1,2</sup>, Jiamou Liu<sup>3</sup>, Zijian Zhang<sup>1,3</sup>, Liehuang Zhu<sup>1</sup>, Angsheng Li<sup>4</sup>

<sup>1</sup>Beijing Institute of Technology, Beijing, China; <sup>2</sup>Zhejiang University, Zhejiang, China

<sup>3</sup>The University of Auckland, Auckland, New Zealand; <sup>4</sup>Beihang University, Beijing, China  
{yiweiliu, zhangzijian, liehuangz}@bit.edu.cn, jiamou.liu@auckland.ac.nz, angsheng@buaa.edu.cn

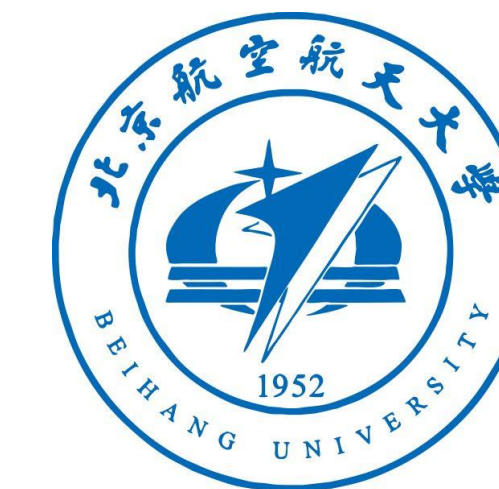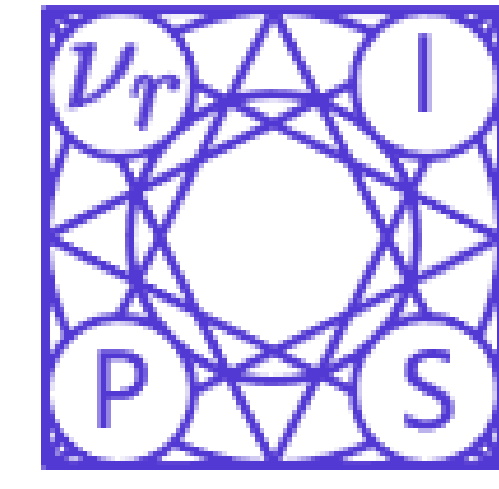

## Background

The disclosure of the users' community affiliations leads to privacy leak. This raises the problem of **community structure deception (CSD)**, which asks for ways to minimally modify the network so that a given community structure maximally hides itself from community detection algorithms.

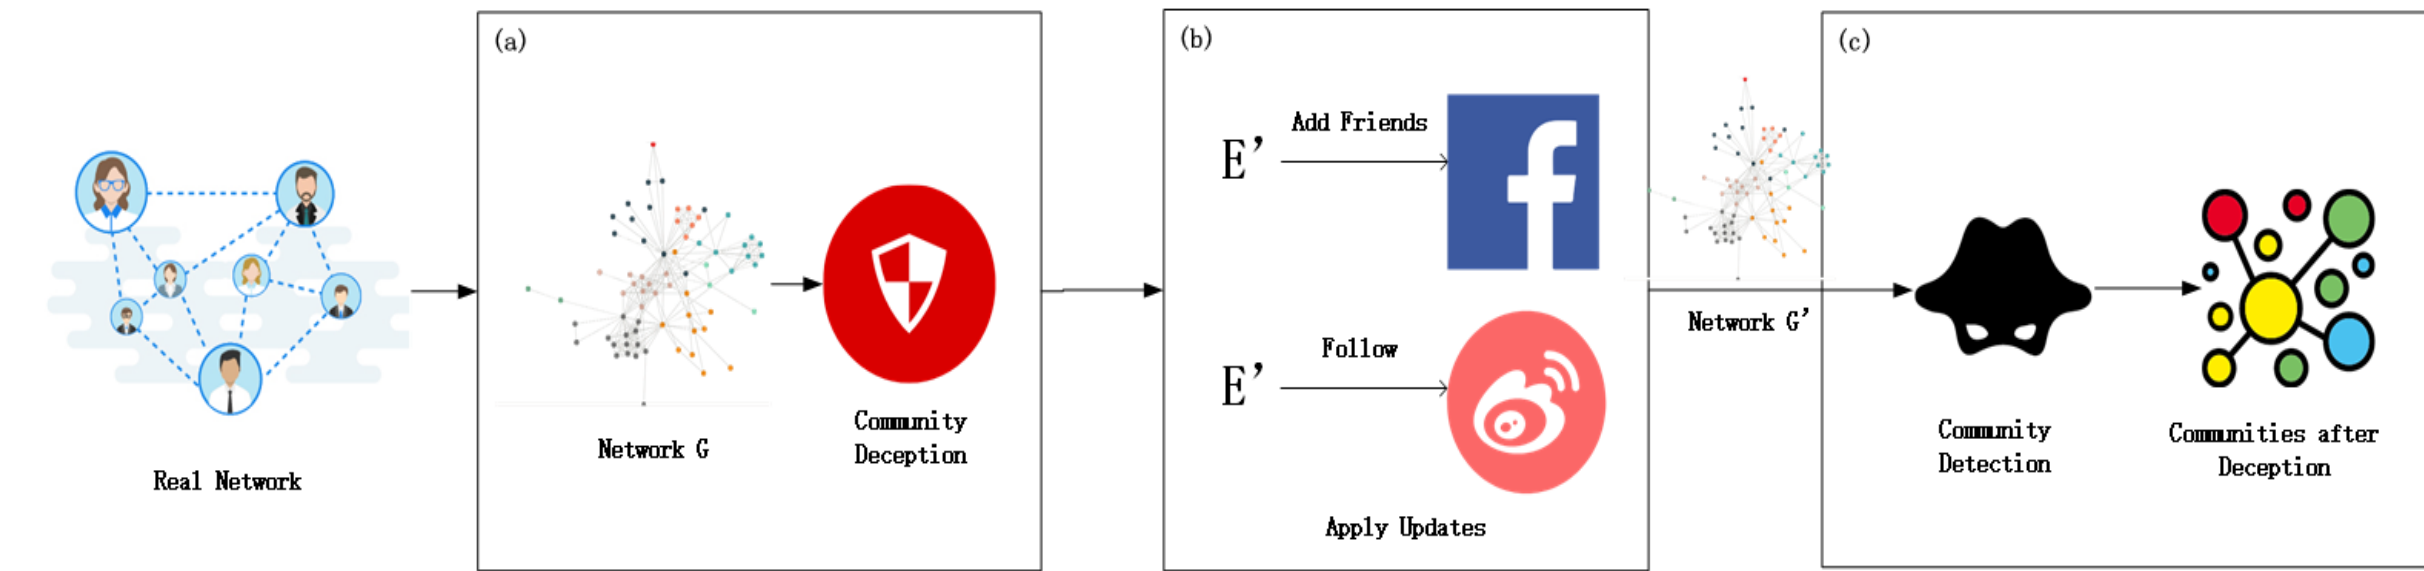

## Problem Formulation

- A social network  $\rightarrow$  An undirected connected graph  $G = (V, E)$ .
- The community structure  $\rightarrow$  a partition  $P = \{X_1, X_2, \dots, X_L\}$  of  $V$ .
- obfuscating  $P \rightarrow$  by adding a number of “dummy edges”.

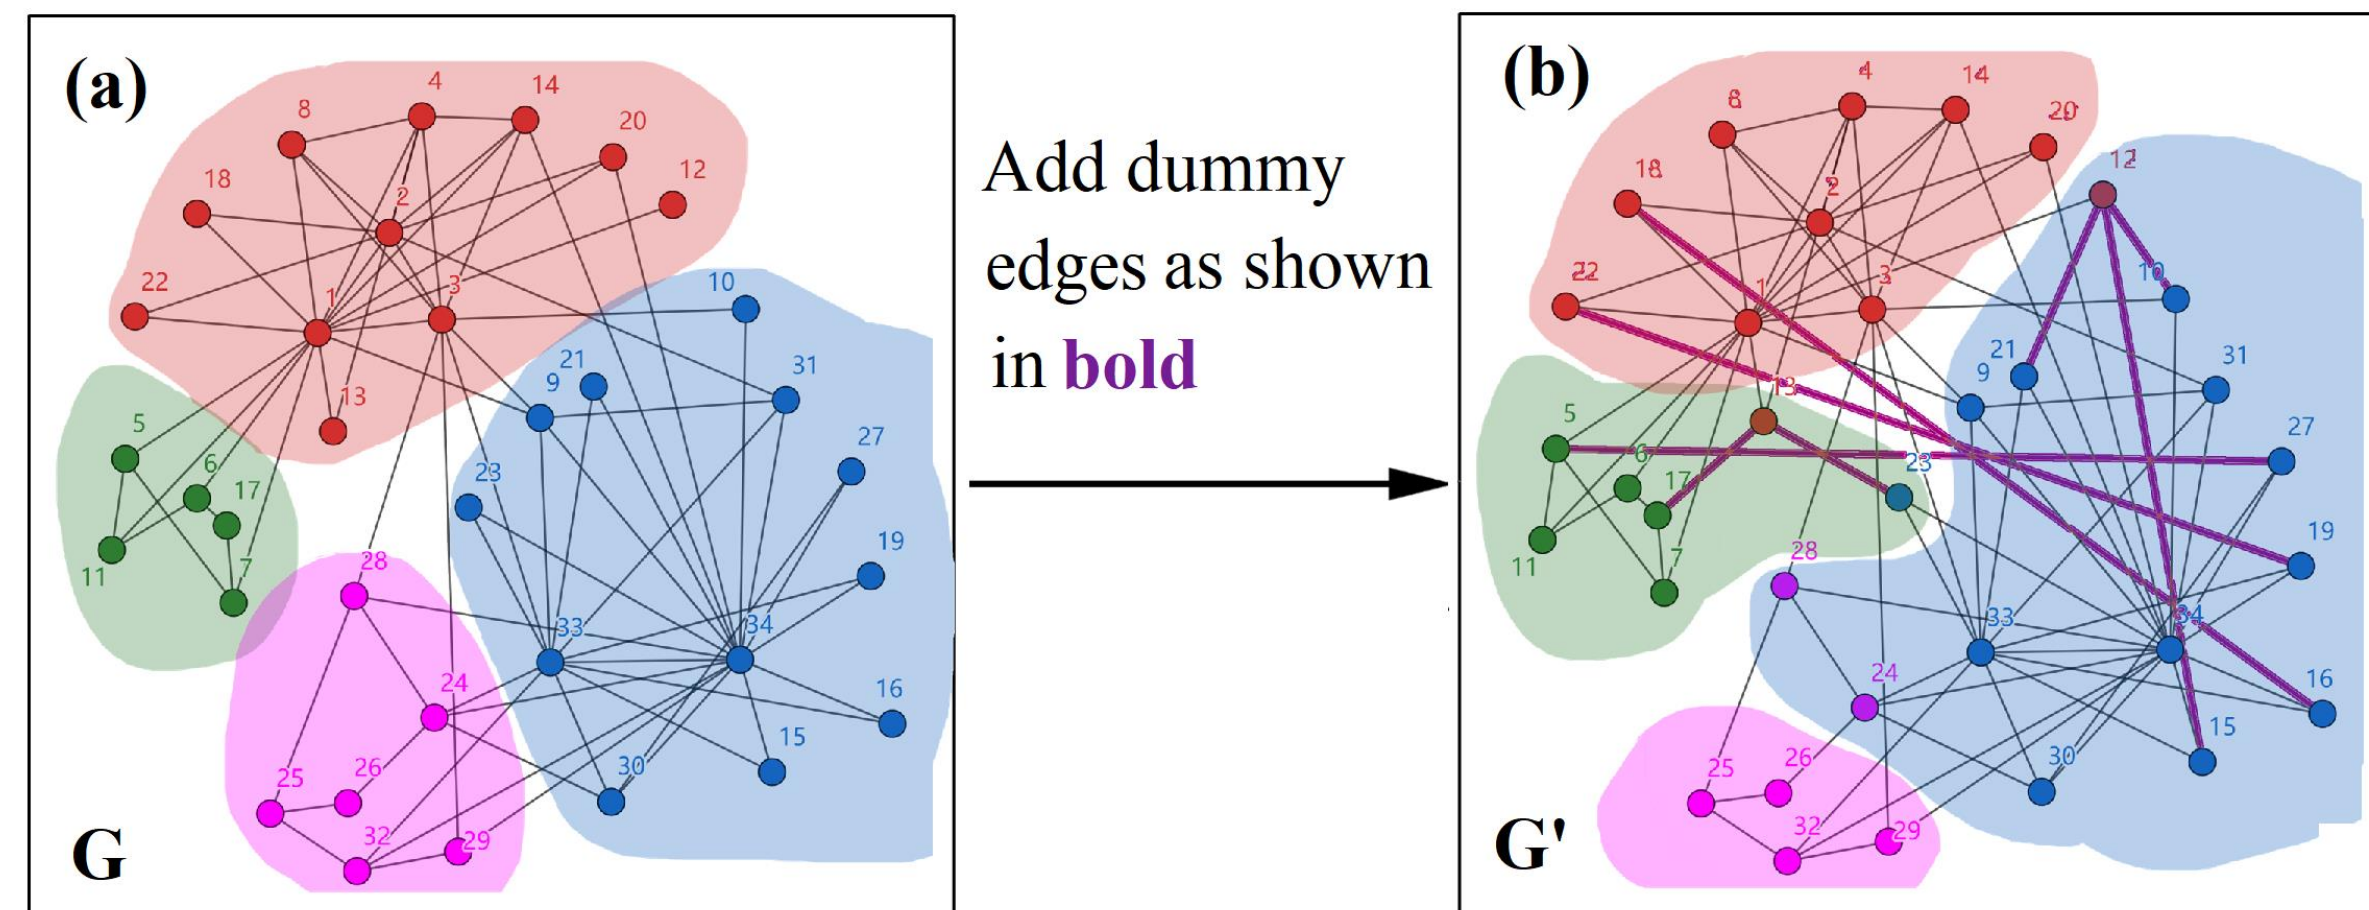

We measure the similarity between  $P$  and  $P'$  by three metrics:

- $J(P, P')$ :  $J$  is **jaccard index**
- $D(P, P')$ :  $D$  is **normalized mutual information**
- $R(P, P')$ :  $R$  is the **recall**

## Residual Entropy-based CSD

**Definition 1. (Shannon entropy)**  $\mathcal{H}(G)$  captures the average number of bits needed to encode the  $n$  vertices in a lossless way:

$$\mathcal{H}(G) := -\sum_{i=1}^{|V|} \frac{d_i}{2|E|} \log_2 \frac{d_i}{2|E|},$$

where  $d_i$  is the degree of vertex  $i$ .

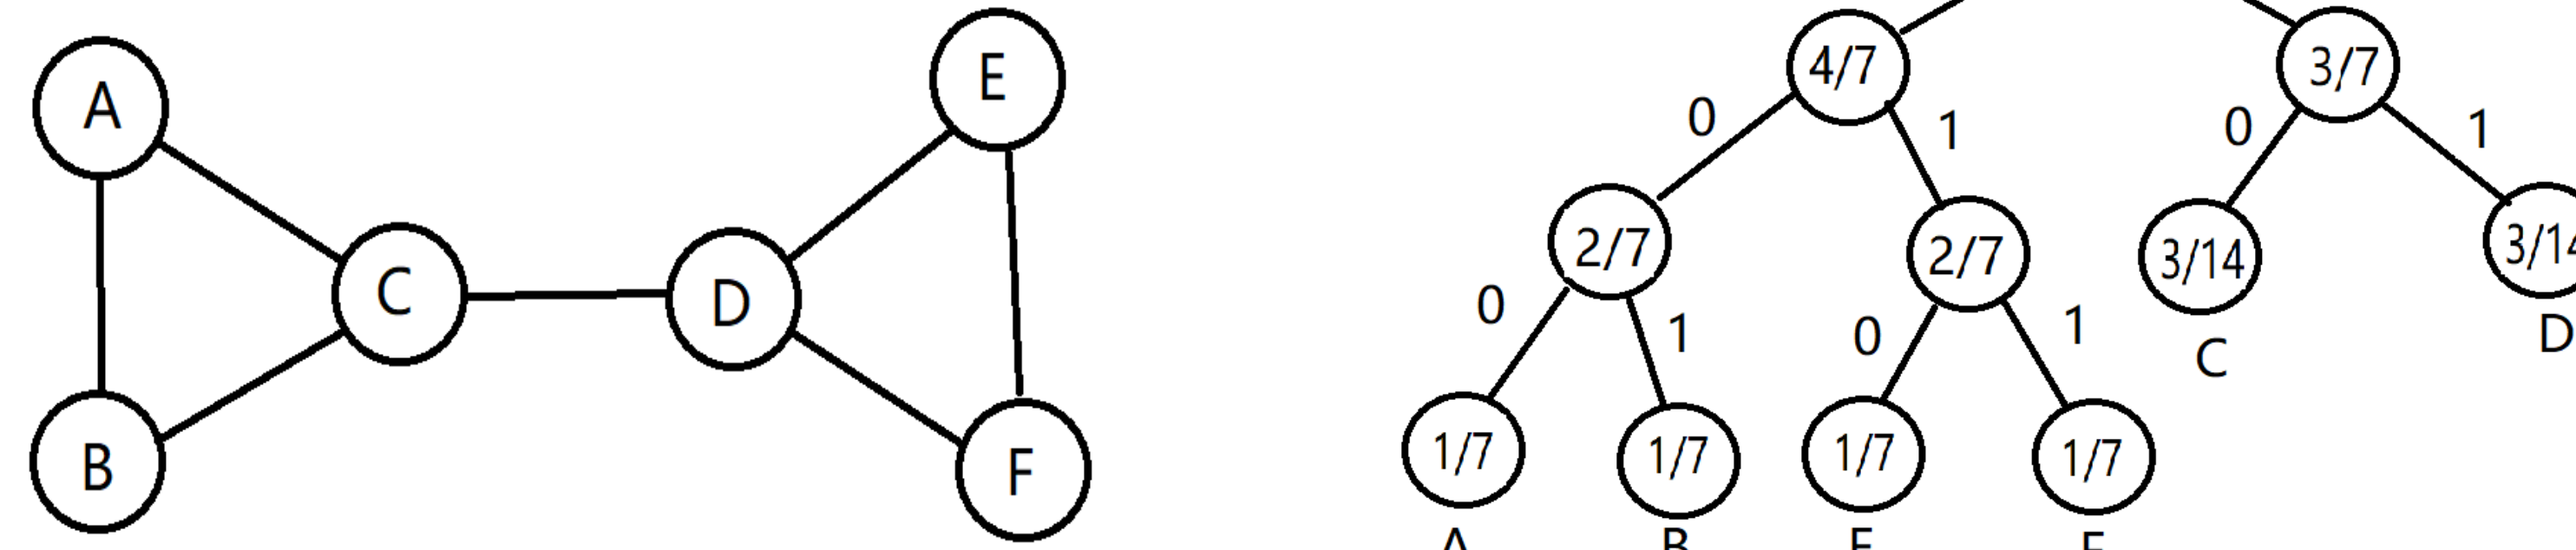

A: 000 B: 001 C: 10 D: 11 E: 010 F: 011  $\mathcal{H}(G) = 5.11$

**Definition 2.** The structural entropy of  $G$  relative to  $P$  is:

$$\mathcal{H}_P(G) := -\sum_{j=1}^L \frac{v_j}{2|E|} \mathcal{H}(G \upharpoonright X_j) - \frac{g_j}{2|E|} \log_2 \frac{v_j}{2|E|},$$

where  $\mathcal{H}(G \upharpoonright X_j) := \sum_{i \in X_j} \frac{d_i}{v_j} \log_2 \frac{d_i}{v_j}$  and  $g_j$  denotes the number of edges with exactly one end point in  $X_j$ .

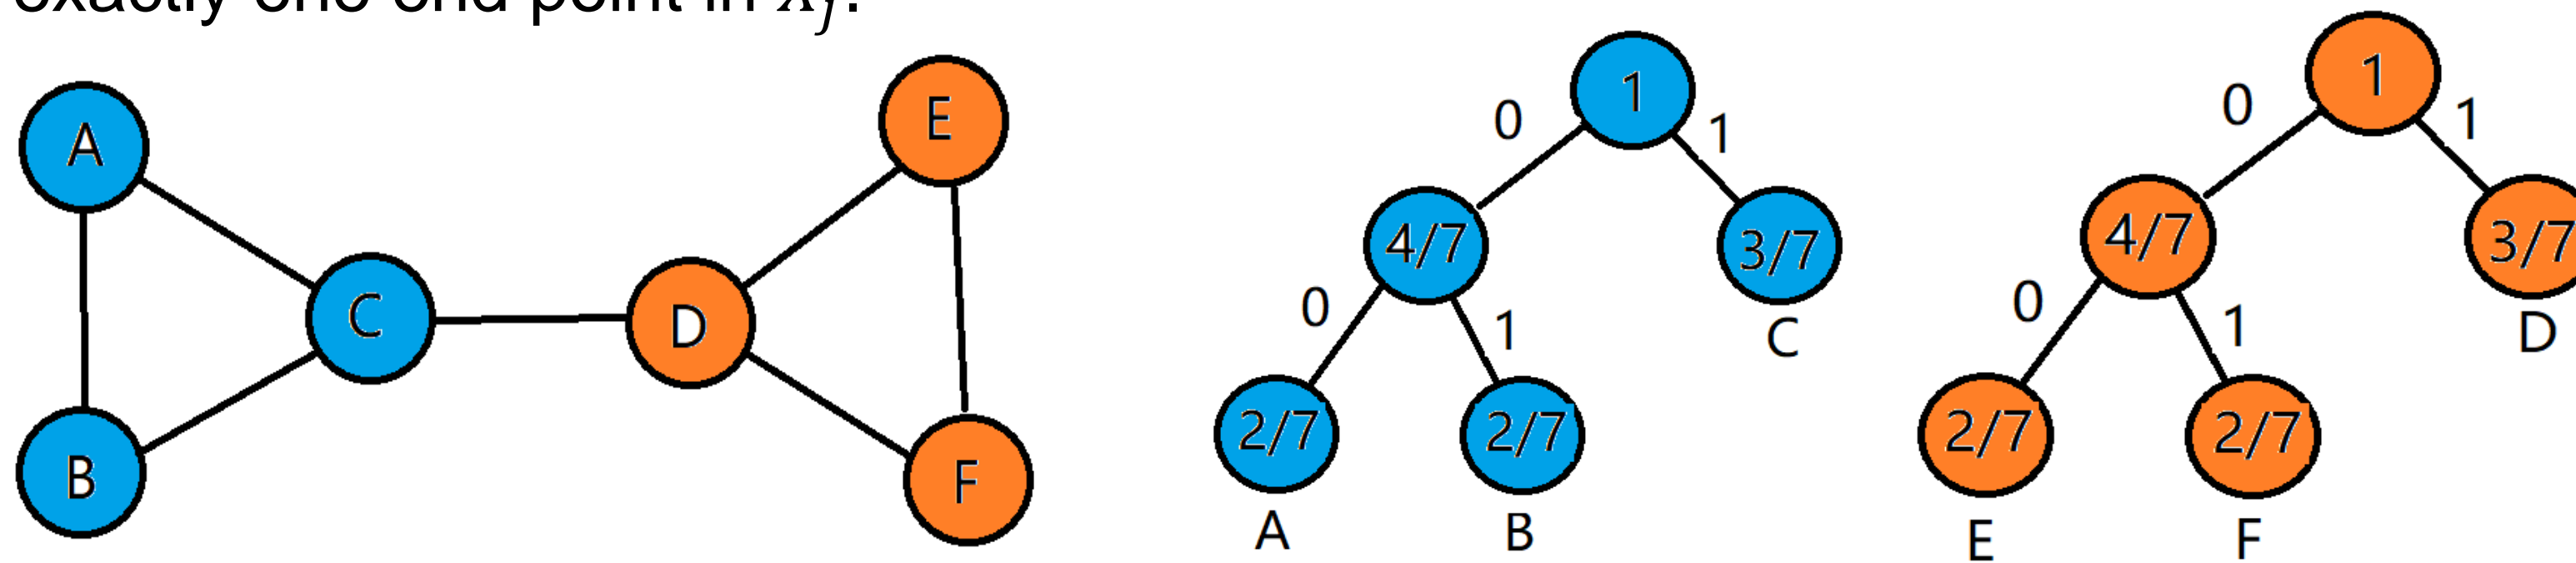

A: 00 B: 01 C: 1 D: 1 E: 00 F: 01  $\mathcal{H}_P(G) = 3.40$

**Definition 3.** The normalized residual entropy of  $P$  is

$$\rho_P(G) := (\mathcal{H}(G) - \mathcal{H}_P(G)) / \mathcal{H}(G).$$

## REM: Algorithm and optimization

**Theorem 1.** There exists a critical non-edge  $\{u, v\}$  is RE-minimizing.

**Theorem 2.** Examining the critical edges implements in  $\mathcal{O}(L|V|)$ .

**Algorithm 1:** An efficient REM deceptor

**Input:** Graph  $G = (V, E)$ ,  $\mathcal{P} = \{X_1, X_2, \dots, X_L\}$

**Output:** A non-edge  $\{u^*, v^*\}$

```

1 Initialize  $\rho^* \leftarrow 1$ ;
2 for  $s \leftarrow 1$  to  $L$  and  $t \leftarrow s$  to  $L$  do
3   if  $X_s \times X_t$  contains no non-edge then
4     continue;
5   for all critical non-edge  $\{u, v\}$  in  $X_s \times X_t$  do
6     Set  $\rho_{u,v} \leftarrow (\mathcal{H}(G \oplus \{u, v\}) - \mathcal{H}_P(G \oplus \{u, v\})) / \mathcal{H}(G \oplus \{u, v\})$ ;
7     if  $\rho_{u,v} < \rho^*$  then
8       Set  $\rho^* \leftarrow \rho_{u,v}$ ,  $u^* \leftarrow u$ , and  $v^* \leftarrow v$ ;
9 return  $\{u^*, v^*\}$ ;
```

A crude implementation runs in  $\mathcal{O}(|V|^2)$  time. We present an  $\mathcal{O}(L|V|)$ -implementation by only examining the critical edges.

## Experiments

**Dataset:** 9 real-world networks. **Adversary:**  $\{btw, gre, inf, lou, spi, wal\}$ .

**Evaluation:** 3 metrics,  $\{J, D, R\}$ . **Benchmark:**  $\{MOM, RAN\}$ .

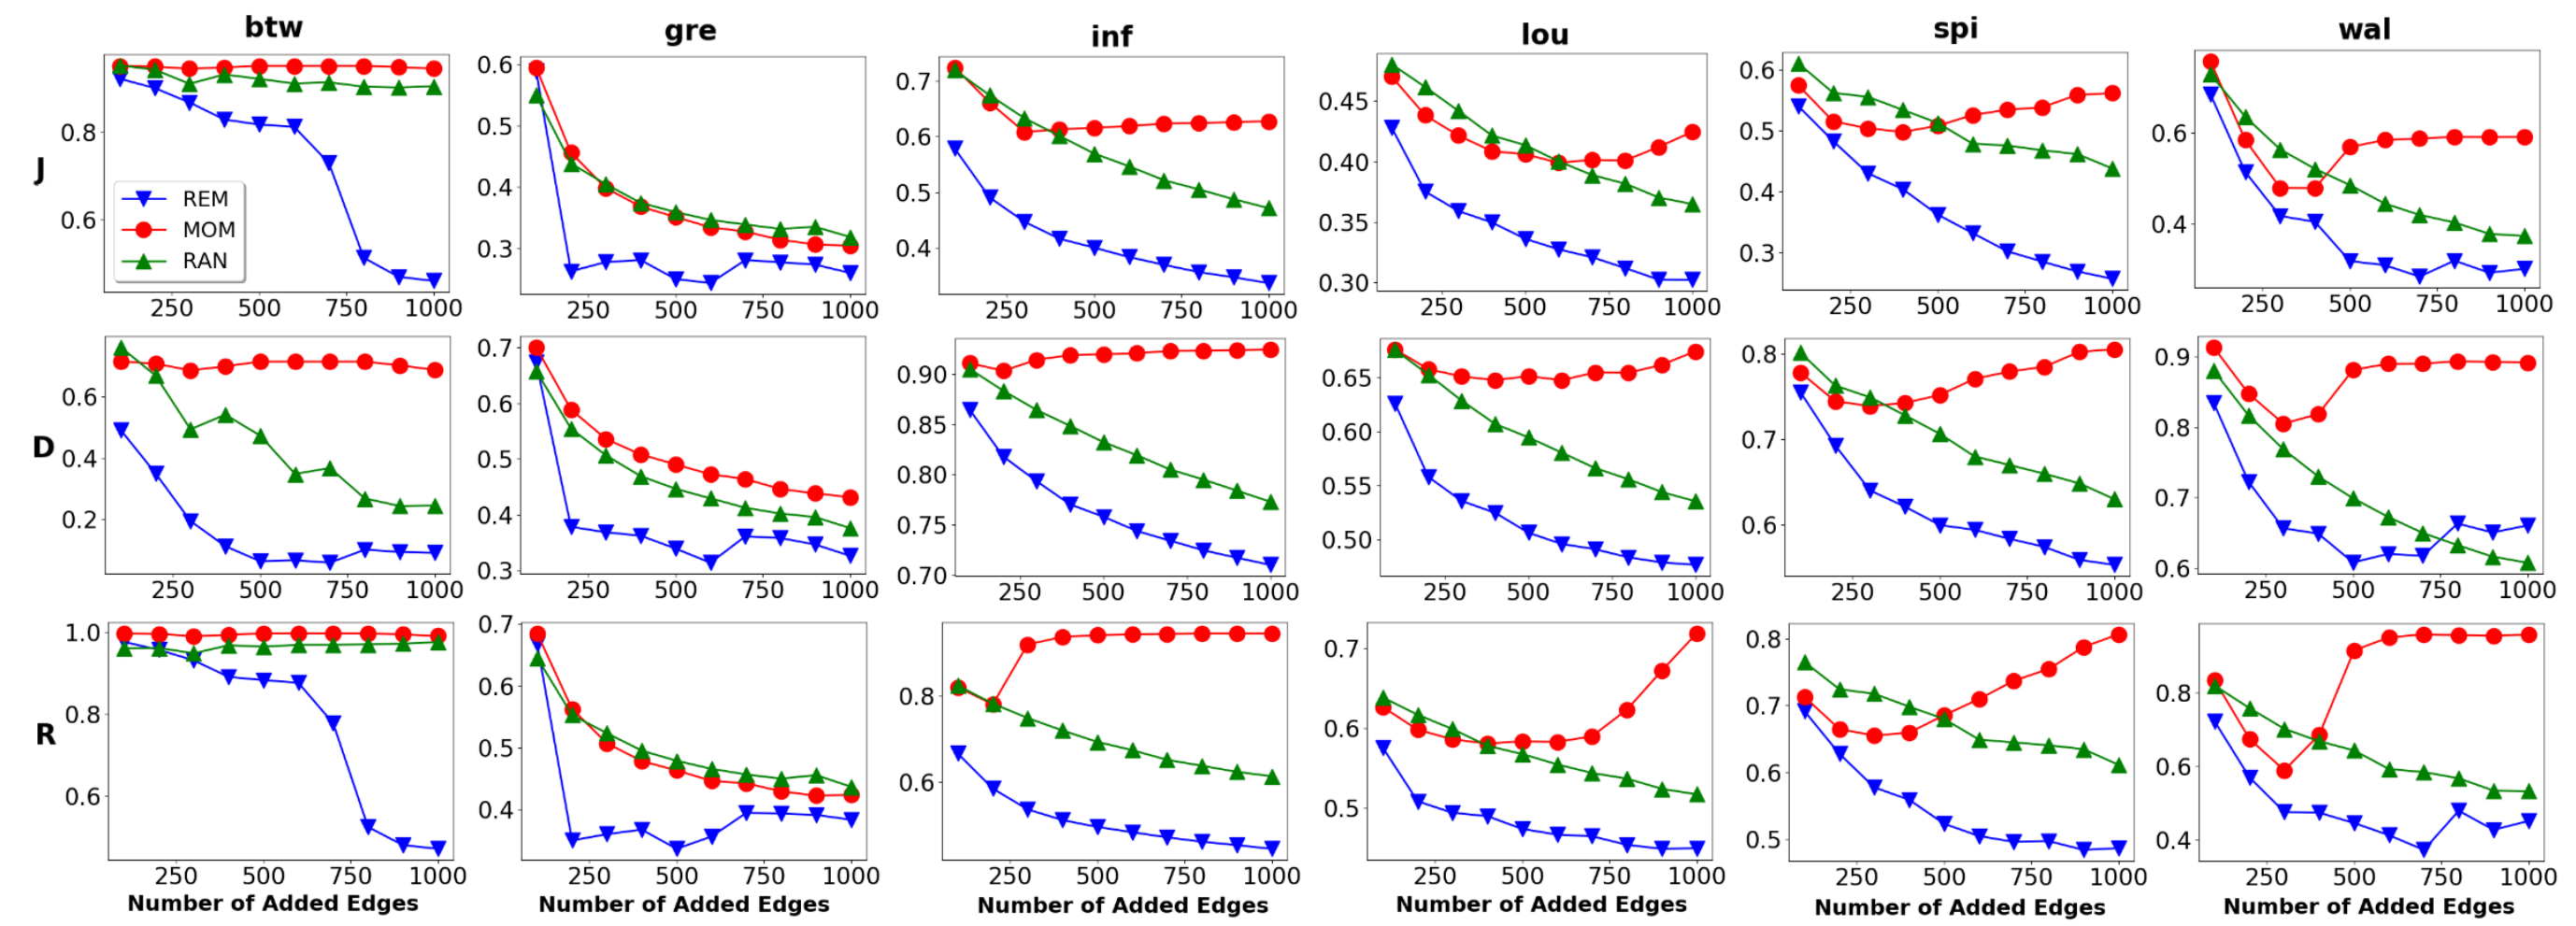

The preservation of the data after applying REM:

| Dataset | $ E' $ | Jaccard              | Clustering coefficient    | Mean shortest path length | 10% Pagerank          | 10% Betweenness       |
|---------|--------|----------------------|---------------------------|---------------------------|-----------------------|-----------------------|
| Dol     | 10     | $1 \rightarrow 0.44$ | $0.308 \rightarrow 0.298$ | $3.357 \rightarrow 2.996$ | $1 \rightarrow 0.833$ | $1 \rightarrow 0.833$ |
| Jaz     | 250    | $1 \rightarrow 0.48$ | $0.520 \rightarrow 0.498$ | $2.23 \rightarrow 2.070$  | $1 \rightarrow 0.895$ | $1 \rightarrow 0.842$ |
| Eml     | 100    | $1 \rightarrow 0.39$ | $0.166 \rightarrow 0.166$ | $3.606 \rightarrow 3.577$ | $1 \rightarrow 0.991$ | $1 \rightarrow 0.982$ |
| PGP     | 400    | $1 \rightarrow 0.45$ | $0.378 \rightarrow 0.377$ | $7.485 \rightarrow 7.279$ | $1 \rightarrow 0.979$ | $1 \rightarrow 0.930$ |
| CAI     | 1000   | $1 \rightarrow 0.49$ | $0.007 \rightarrow 0.007$ | $3.875 \rightarrow 3.869$ | $1 \rightarrow 0.983$ | $1 \rightarrow 0.977$ |
| Bri     | 1000   | $1 \rightarrow 0.44$ | $0.111 \rightarrow 0.111$ | $4.858 \rightarrow 4.854$ | $1 \rightarrow 0.993$ | $1 \rightarrow 0.971$ |

## Conclusions

- Utilize community based structural entropy to the CSD problem
- Propose a residual minimization (REM) algorithm.
- Reduce search space to critical edges to optimize REM.
- Validate the performance of our algorithm.
